# Supplementary material for: Effects of a single bout of exercise on human hemocytes and serum interleukin 3, erythropoietin, and soluble transferrin receptor in a hot and humid environment
Source: PeerJ. 2024 Nov 29;12:e18603. doi: 10.7717/peerj.18603 (PMC11610479; doi:10.7717/peerj.18603)
Supplement: Supplemental Information 1 [file peerj-12-18603-s001.xlsx]

## Sheet: Sheet1
				VO2max（ml）
Group	Age（year）	Height（cm）	Body weight（kg）	Hot and humid environment	Normal
Q	22	165	57	2810	3022
Q	21	174	68.5	3354	3606
Q	21	169	58	3294	3542
Q	21	171	69	3755	4038
Q	21	172	66.5	3073	3304
Q	21	180	69	2797	3008
Q	21	178	65.5	2935	3156
Q	22	171	66	3208	3449
E1	21	168	61.5	3148	3385
E1	22	167	67	3768	4052
E1	21	188	73	4162	4475
E1	22	165	62.5	3126	3362
E1	22	175.5	62	3499	3762
E1	20	176.5	60.5	3186	3426
E1	21	168	58.5	2653	2853
E1	21	170	62	3633	3907
E2	22	174	75	3865	4156
E2	22	168	70	2959	3182
E2	21	178.5	66.5	3455	3715
E2	21	176.5	61	3162	3400
E2	21	182.5	67	3181	3421
E2	22	172	61	3074	3305
E2	22	175	66	3613	3885
E2	21	172.5	65.5	3961	4259
E3	21	181	77	3174	3413
E3	21	170	69	3709	3988
E3	21	175	59.5	3367	3620
E3	20	175	65.5	3326	3576
E3	20	171.5	64	3073	3304
E3	20	170.5	62	2862	3077
E3	21	178	67	2839	3053
E3	20	176	69	3294	3542
