# Supplementary material for: Effects of a single bout of exercise on human hemocytes and serum interleukin 3, erythropoietin, and soluble transferrin receptor in a hot and humid environment
Source: PeerJ. 2024 Nov 29;12:e18603. doi: 10.7717/peerj.18603 (PMC11610479; doi:10.7717/peerj.18603)
Supplement: Supplemental Information 2 [file peerj-12-18603-s002.xls]

## Sheet: Sheet1
	Body weight		sublingual temperature		SaO2		PI
Group	Before	After	Before	After	Before	After	Before	After
Q	57	57	36.5	36.9	99	99	2	1.3
Q	68	68	36.2	36.8	99	99	1	2.1
Q	58	58	36.6	37	99	99	1	1.3
Q	69	69	36.6	36.9	95	99	1.8	2.3
Q	66.5	66	36.1	37	99	99	4.4	1.9
Q	69	69	36.9	37	99	99	5	2.4
Q	65.5	65.5	36	37	99	99	2.3	1
Q	66	66	36.5	37	99	98	7.3	1.9
E1	61.5	61.5	37.1	37.3	99	99	1.1	8.8
E1	67	66	36.7	37.1	99	98	1.4	9.2
E1	73	72	37	37.2	99	99	2	6.5
E1	62.5	61.5	36.4	36.9	99	98	2	11
E1	61.5	59.5	36.3	37.1	99	99	1.1	3.2
E1	60.5	60	36.9	37.7	99	98	0.9	9.2
E1	59	58.5	36.3	36.7	99	98	1.8	5.4
E1	62	60.5	36.7	37.3	99	98	2.5	12
E2	74	72.5	37.5	38	98	98	3.8	9.5
E2	70	69	37	36.8	99	97	1.8	10
E2	66	65	36.9	37.8	99	99	2.5	4.4
E2	61	60	36.8	37.9	96	99	4.3	7
E2	67	66	37	37.5	96	99	2.6	12
E2	61	61	36.1	37.6	99	95	4.7	13
E2	65.5	64.5	36.9	38.2	97	99	2.6	4.5
E2	65	64.5	37	38.5	99	96	6.2	9.9
E3	77	76	36.9	38.1	99	99	1.5	5.2
E3	69.5	68	36.3	38.5	99	95	1.2	16
E3	59.5	58	37	37.5	99	95	2.3	1.6
E3	64.5	64	36.6	37.2	98	99	1.6	6.6
E3	64.5	63.5	36.8	38.1	95	98	1.3	5.3
E3	61	61	37.5	38.4	99	99	1.9	1.4
E3	67	65.5	36.7	36.65	99	99	2.3	1.7
E3	70	68.5	36.7	37.3	99	99	6	10
