# Supplementary material for: Effects of a single bout of exercise on human hemocytes and serum interleukin 3, erythropoietin, and soluble transferrin receptor in a hot and humid environment
Source: PeerJ. 2024 Nov 29;12:e18603. doi: 10.7717/peerj.18603 (PMC11610479; doi:10.7717/peerj.18603)
Supplement: Supplemental Information 3 [file peerj-12-18603-s003.xls]

## Sheet: Sheet1
	WBC(109/L)		RBC(1012/L)		HGB(g/L0		HCT(%)		MCH(pg)		MCHC(fl)		MCV(fL)		RDW-SD(%)		RDW-CV(%)		PLT(109/L)		PCT(%)		MPV(fL)
Group	Before	After	Before	After	Before	After	Before	After	Before	After	Before	After	Before	After	Before	After	Before	After	Before	After	Before	After	Before	After
Q	5.82	5.37	4.99	5.11	152	152	45.6	46.5	30.5	29.7	333	327	91.4	91	41	41	12.5	12.7	185	190	0.23	0.24	12.2	12.8
Q	8.65	9.07	5.19	5.16	158	156	47.1	46.5	30.4	30.2	335	335	90.8	90.1	39	39	12	12.1	197	201	0.21	0.23	10.8	11.3
Q	7.25	7.25	5.26	5.26	148	148	45.5	45.5	28.1	28.1	325	325	86.5	86.5	38	38	11.9	11.9	194	194	0.2	0.2	10.4	10.4
Q	4.08	7.64	4.93	4.97	139	141	42.5	42.9	28.2	28.4	327	329	86.2	86.3	39	40	12.7	12.8	249	249	0.26	0.27	10.2	10.9
Q	12.26	11.67	4.45	4.51	137	135	41	41.7	30.8	29.9	334	324	92.1	92.5	37	37	11.1	11.1	191	194	0.23	0.24	12.2	12.5
Q	15.03	14.85	5.24	5.33	155	156	45.4	46.3	29.6	29.3	341	337	86.6	86.9	38	38	11.9	12.1	319	324	0.33	0.35	10.2	10.7
Q	7.78	8.95	5.49	5.42	171	164	48.6	48.1	31.1	30.3	352	341	88.5	88.7	40	40	12.4	12.5	147	142	0.19	0.18	12.8	12.9
Q	6.53	6.74	4.93	5.03	150	151	45.1	46.2	30.4	30	333	327	91.5	91.8	38	38	11.5	11.5	245	245	0.27	0.28	11.2	11.4
E1	8.77	8.75	6.58	6.7	127	127	38.9	39	19.3	19	326	326	59.1	58.2	38	38	20.5	20.6	334	352	0.39	0.36	11.8	10.1
E1	8.87	7.59	5.54	6.4	158	182	46.2	51.8	28.5	28.4	342	351	83.4	80.9	38	38	12.7	13	274	253	0.28	0.28	10.4	11
E1	8.41	7.19	4.95	4.93	148	148	44.7	43.7	29.9	30	331	339	90.3	88.6	40	39	12.4	12.4	289	309	0.3	0.32	10.5	10.4
E1	12.1	12.47	5.29	5.59	151	167	45.5	47.6	28.5	29.9	332	351	86	85.2	36	37	11.6	11.9	197	209	0.24	0.26	12.2	12.3
E1	8.7	9.64	5.32	5.46	155	153	45.3	46.2	29.1	28	342	331	85.2	84.6	38	38	12.4	12.5	315	332	0.36	0.36	11.4	10.8
E1	7.89	8.62	5.07	5.09	142	143	45.3	44.6	28	28.1	313	321	89.3	87.6	41	40	12.7	12.8	184	214	0.21	0.24	11.3	11.5
E1	9.3	9.75	4.71	5.39	148	174	46.1	51.8	31.4	32.3	321	336	97.9	96.1	41	40	11.5	11.8	302	274	0.32	0.31	10.7	11.4
E1	8.22	8.84	6.09	5.26	177	154	53.7	45.9	29.1	29.3	330	336	88.2	87.3	40	39	12.7	12.3	143	213	0.17	0.24	11.6	11.3
E2	7.03	7.62	4.7	4.93	146	150	43.6	45.3	31.1	30.4	335	331	92.8	91.9	40	40	12.3	12.4	195	223	0.22	0.25	11.4	11.2
E2	11.38	11.66	4.53	4.77	146	151	43.3	45.5	32.2	31.7	337	332	95.6	95.4	40	41	11.8	12	233	292	0.25	0.32	10.7	10.9
E2	10.63	11.52	5.07	5.47	150	161	46.1	48.8	29.6	29.4	325	330	90.9	89.2	39	39	12.2	12.2	194	232	0.22	0.26	11.1	11.4
E2	5.75	6.17	4.86	4.95	140	145	43.9	43.9	28.8	29.3	319	330	90.3	88.7	42	41	12.8	12.8	168	172	0.19	0.2	11.5	11.4
E2	6.76	8.07	4.84	5.11	141	147	43.4	45.4	29.1	28.8	325	324	89.7	88.8	40	40	12.4	12.6	213	253	0.24	0.29	11.4	11.6
E2	10.17	8.76	4.55	4.85	134	150	42	44.2	29.5	30.9	319	339	92.3	91.1	39	39	11.9	12	226	260	0.3	0.35	13.1	13.5
E2	7.18	7.64	5.6	5.92	116	121	37.1	38.8	20.7	20.4	313	312	66.3	65.5	38	38	16.3	17.7	302	347	0.33	0.37	10.8	10.6
E2	6.32	7.79	4.73	4.91	135	140	42.4	43.3	28.5	28.5	318	323	89.6	88.2	41	40	12.7	12.7	206	234	0.24	0.27	11.5	11.3
E3	6.44	6.75	5.23	5.35	149	152	45.4	45.6	28.5	28.4	328	333	86.8	85.2	44	43	13.9	13.9	204	228	0.23	0.27	11.4	11.6
E3	6.16	6.95	4.48	4.64	135	140	41.8	42.7	30.1	30.2	323	328	93.3	92	42	41	12.7	12.7	248	264	0.26	0.28	10.5	10.6
E3	6.62	7.32	5.06	5.11	149	153	45.3	45.7	29.4	29.9	329	335	89.5	89.4	41	41	12.9	12.8	247	278	0.26	0.3	10.4	10.8
E3	8.86	10.4	5.7	5.76	159	161	48.9	48.7	27.9	28.8	325	331	85.8	84.5	40	39	12.9	12.8	285	339	0.29	0.35	10.2	10.5
E3	5.85	6.66	4.86	4.94	140	140	43.1	43.6	28.8	28.3	325	321	88.7	88.3	43	43	13.5	13.6	247	295	0.27	0.32	10.9	10.9
E3	5.46	6.09	4.98	5.09	135	132	43.3	44	27.1	25.9	312	300	86.9	86.4	40	40	12.7	12.8	255	301	0.28	0.33	10.9	11.1
E3	4.9	6.32	4.99	5.28	153	161	45.4	47.8	30.7	30.5	337	337	91	90.5	39	40	12.2	12.4	175	204	0.2	0.24	11.2	12
E3	5.35	6.47	4.95	5.21	148	157	46	47.5	29.9	30.1	322	331	92.9	91.2	41	40	12.3	12.3	196	226	0.21	0.25	10.8	11
