# Supplementary material for: Effects of a single bout of exercise on human hemocytes and serum interleukin 3, erythropoietin, and soluble transferrin receptor in a hot and humid environment
Source: PeerJ. 2024 Nov 29;12:e18603. doi: 10.7717/peerj.18603 (PMC11610479; doi:10.7717/peerj.18603)
Supplement: Supplemental Information 4 [file peerj-12-18603-s004.xlsx]

## Sheet: Sheet1
	Q		E1		E2		E3
EPO	before	after	before	after	before	after	before	after
	10.555	18.2863	16.9612	15.1517	16.8216	21.188	10.4669	15.8476
	15.6979	16.8534	12.5345	13.8479	19.0512	37.808	13.6229	12.1802
	10.6868	9.65572	16.1166	11.7756	22.8658	19.1727	22.8603	20.8704
	12.2836	14.2834	23.1278	22.5107	16.8057	13.9616	22.0516	17.5185
	14.4834	18.0339	17.0898	19.3405	23.8371	21.153	17.7765	15.333
	15.6088	17.1748	15.6868	20.5673	17.2682	13.0739	10.4536	17.3827
			17.8899	18.6253	14.0525	17.0294	19.2632	11.5214
			14.3832	21.906	10.8008	11.5099
sTfR	before	after	before	after	before	after	before	after
	4.84467	10.6282	1.72785	5.50198	3.25383	6.90069	1.14261	6.85298
	5.41381	5.6198	2.43117	6.47206	6.93648	5.01095	1.62847	1.26172
	5.77343	5.45488	4.006	4.34291	3.43953	8.40114	3.34738	5.95043
	1.20424	2.3407	9.338	12.4821	8.24425	9.60183	1.33211	2.15136
	5.53731	4.43606	8.48569	16.1347	8.7639	6.81722	5.44445	5.69056
	3.23353	3.89605	4.72775	4.42441	10.665	14.1886	2.13736	3.05753
			1.31718	1.31099	2.18092	6.05692	1.4347	4.71606
			2.95681	8.19602	5.22847	5.50198
IL-3	before	after	before	after	before	after	before	after
	3.77608	3.7042	8.60711	4.52842	24.5679	2.3635	15.7524	12.5255
	7.95079	7.86691	23.9252	11.4037	7.86691	10.652	9.64434	3.84823
	7.97179	4.13959	11.1775	5.48165	12.6412	10.4916	6.99766	0.564492
	8.10729	6.20593	21.2382	20.7975	8.37297	10.8339	6.21014	0.754875
	8.75681	2.15256	8.64982	9.81961	6.1902	10.3188	3.07042	2.89877
	12.5024	14.4111	5.89282	6.99766	20.2304	10.9417	2.42919	3.95698
			6.87524	0.491568	7.78322	12.0878	4.32386	8.24584
			21.6288	0.794212	10.4605	6.1106
